# Supplementary material for: Knowledge of Medical Students and Medical Professionals Regarding Nutritional Deficiencies in Patients with Celiac Disease
Source: MDPI journal article supplement (doi:10.3390/nu13061771), 2021-05-22
Supplement: s1 [file s1]

**Table S1. A survey on a gluten-free diet in patients with celiac disease – part evaluating the knowledge of the respondents**

|                                                                                                                                                                  |                                                                                                                                                                                                                                                   |
|------------------------------------------------------------------------------------------------------------------------------------------------------------------|---------------------------------------------------------------------------------------------------------------------------------------------------------------------------------------------------------------------------------------------------|
| In your opinion, is a gluten-free diet healthy?                                                                                                                  |                                                                                                                                                                                                                                                   |
| My knowledge of a gluten-free diet is sufficient                                                                                                                 |                                                                                                                                                                                                                                                   |
| Patients with celiac disease should follow a gluten-free diet that contains more calories compared to healthy people.                                            |                                                                                                                                                                                                                                                   |
| Patients with celiac disease can be exposed to nutritional deficiencies by following a gluten-free diet.                                                         |                                                                                                                                                                                                                                                   |
| Individuals with celiac disease who follow a gluten-free diet can become overweight or obese.                                                                    |                                                                                                                                                                                                                                                   |
| A gluten-free diet favors eating fewer complex carbohydrates.                                                                                                    |                                                                                                                                                                                                                                                   |
| Gluten-free processed foods contain more saturated fat than their gluten-containing counterparts.                                                                |                                                                                                                                                                                                                                                   |
| Gluten-free processed foods contain more dietary fiber than their gluten-containing counterparts.                                                                |                                                                                                                                                                                                                                                   |
| The glycemic index of gluten-free processed foods is higher compared with their gluten-containing counterparts.                                                  |                                                                                                                                                                                                                                                   |
| All patients with celiac disease should have regular assessment of vitamin D levels, regardless of their supplementation.                                        |                                                                                                                                                                                                                                                   |
| The use of a gluten-free diet in a patient with celiac disease does not require a dietitian's consultation due to the widespread access to gluten-free products. |                                                                                                                                                                                                                                                   |
| Patients with celiac disease should be advised:                                                                                                                  | <ul style="list-style-type: none"> <li>a) supplementation with multivitamin drugs</li> <li>b) vitamin D supplementation</li> <li>c) consuming products enriched with micronutrients</li> <li>d) a gluten-free diet alone is sufficient</li> </ul> |
| Deficiencies of which micronutrients may occur in patients with celiac disease following a gluten-free diet?                                                     | <ul style="list-style-type: none"> <li>a) iron</li> <li>b) calcium</li> <li>c) zinc</li> <li>d) magnesium</li> <li>e) copper</li> <li>f) iodine</li> </ul>                                                                                        |
| Deficiencies of which vitamins can occur in patients with celiac disease following a gluten-free diet?                                                           | <ul style="list-style-type: none"> <li>a) vitamin A</li> <li>b) vitamin E</li> <li>c) vitamin C</li> <li>d) vitamin D</li> <li>e) vitamin B1</li> <li>f) vitamin B12</li> <li>g) folic acid</li> </ul>                                            |
